# Supplementary material for: Thermal crystallization of amorphous calcium phosphate combined with citrate and fluoride doping: a novel route to produce hydroxyapatite bioceramics
Source: Royal Society of Chemistry journal article supplement (doi:10.1039/d1tb00601k), 2021-01-01
Supplement: d1tb00601k1.pdf [file d1tb00601k1.pdf]

# Electronic Supplementary Information

## Thermal crystallization of amorphous calcium phosphate combined with citrate and fluoride doping: a novel route to produce hydroxyapatite bioceramics

*Lorenzo Degli Esposti,<sup>\*a</sup> Smilja Markovic,<sup>b</sup> Nenad Ignjatovic,<sup>b</sup> Silvia Panseri,<sup>a</sup> Monica Montesi,<sup>a</sup> Alessio Adamiano,<sup>a</sup> Marco Fosca,<sup>c</sup> Julietta V. Rau,<sup>c,d</sup> Vuk Uskoković,<sup>e</sup> and Michele Iafisco<sup>\*a</sup>*

<sup>a</sup>Institute of Science and Technology for Ceramics (ISTEC), National Research Council (CNR), Via Granarolo 64, 48018 Faenza (Italy). E-mail: [lorenzo.degliesposti@istec.cnr.it](mailto:lorenzo.degliesposti@istec.cnr.it), [michele.iafisco@istec.cnr.it](mailto:michele.iafisco@istec.cnr.it)

<sup>b</sup>Institute of Technical Sciences of the Serbian Academy of Science and Arts, Knez Mihailova 35/IV, P.O. Box 377, 11000 Belgrade, Serbia.

<sup>c</sup>Institute of Structure of Matter (ISM), National Research Council (CNR), Via del Fosso del Cavaliere 100, 00133 Rome (Italy).

<sup>d</sup>Sechenov First Moscow State Medical University, Institute of Pharmacy, Department of Analytical, Physical and Colloid Chemistry, Trubetskaya 8, build. 2, 119991 Moscow, Russia.

<sup>e</sup>TardigradeNano LLC, Irvine, CA 92604, USA.

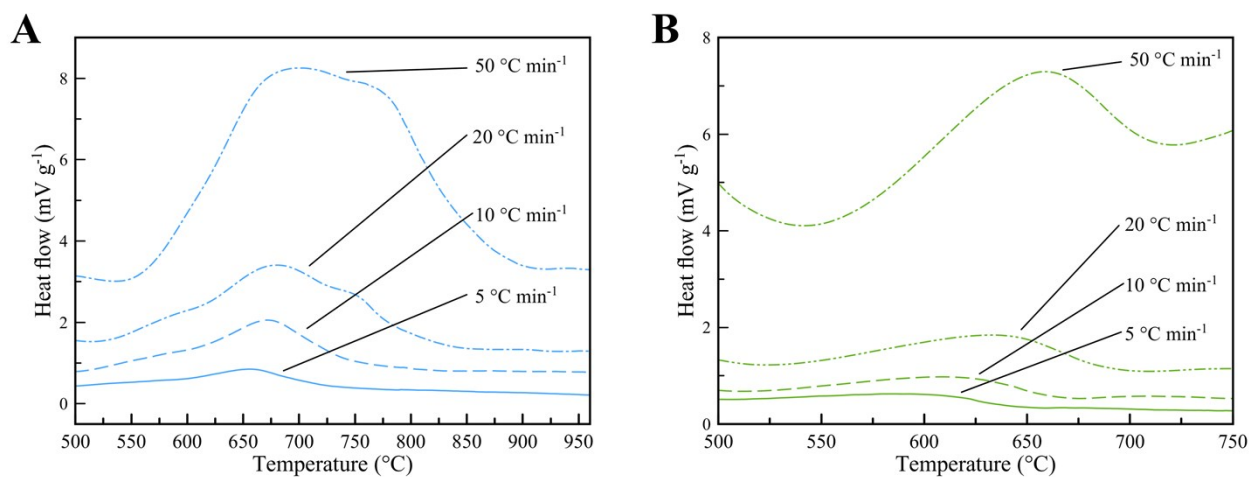

**Figure S1.** The shift in the crystallization peak for (A) Cit-ACP-1 and (B) Cit-FACP-1 to higher temperatures in direct proportion with the heating rate.

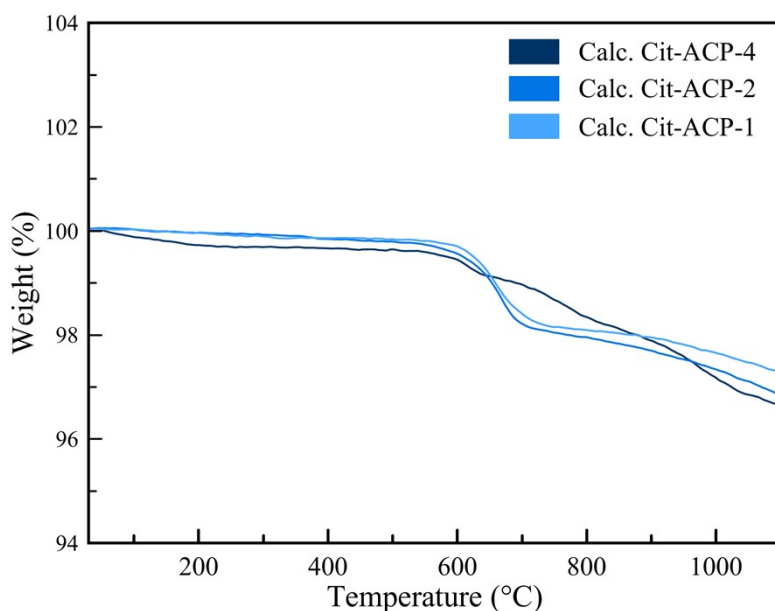

**Figure S2.** TGA curves of calcined Cit-ACP-4, Cit-ACP-2, and Cit-ACP-1.

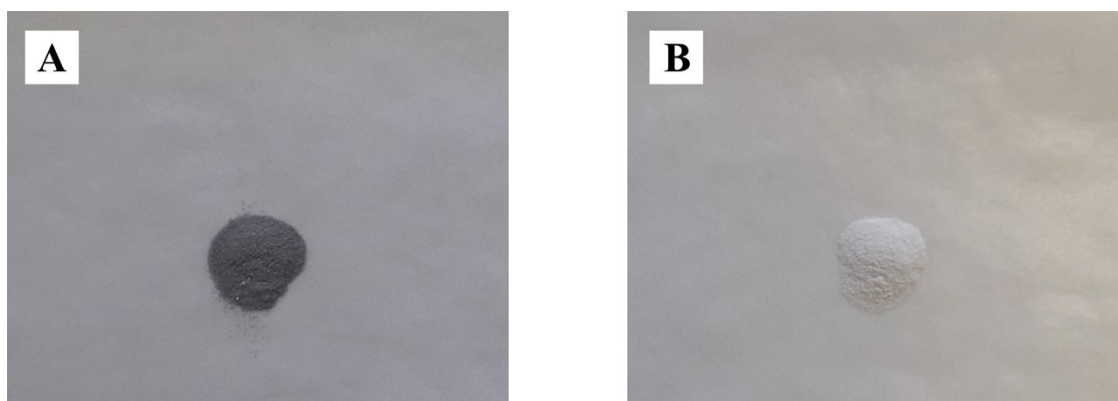

**Figure S3.** Pictures of calcined (A) Cit-ACP-4 and (B) Cit-ACP-1.
